# Supplementary material for: Development of surface engineered antigenic exosomes as vaccines for respiratory syncytial virus
Source: PubMed Central journal article supplement (PMC8560785; doi:10.1038/s41598-021-00765-x), 2021-11-01
Supplement: 41598_2021_765_MOESM1_ESM.pdf [file 41598_2021_765_MOESM1_ESM.pdf]

**Development of surface engineered antigenic exosomes as vaccines for respiratory syncytial  
virus**

Suyeon Hong<sup>1</sup>, Shaobo Ruan<sup>2</sup>, Zachary Greenberg<sup>2</sup>, Mei He<sup>2</sup> and Jodi L. McGill<sup>1</sup>

<sup>1</sup>Department of Veterinary Microbiology and Preventive Medicine, Iowa State University, Ames,

IA

<sup>2</sup>Department of Pharmaceutics, College of Pharmacy, University of Florida, Gainesville, FL

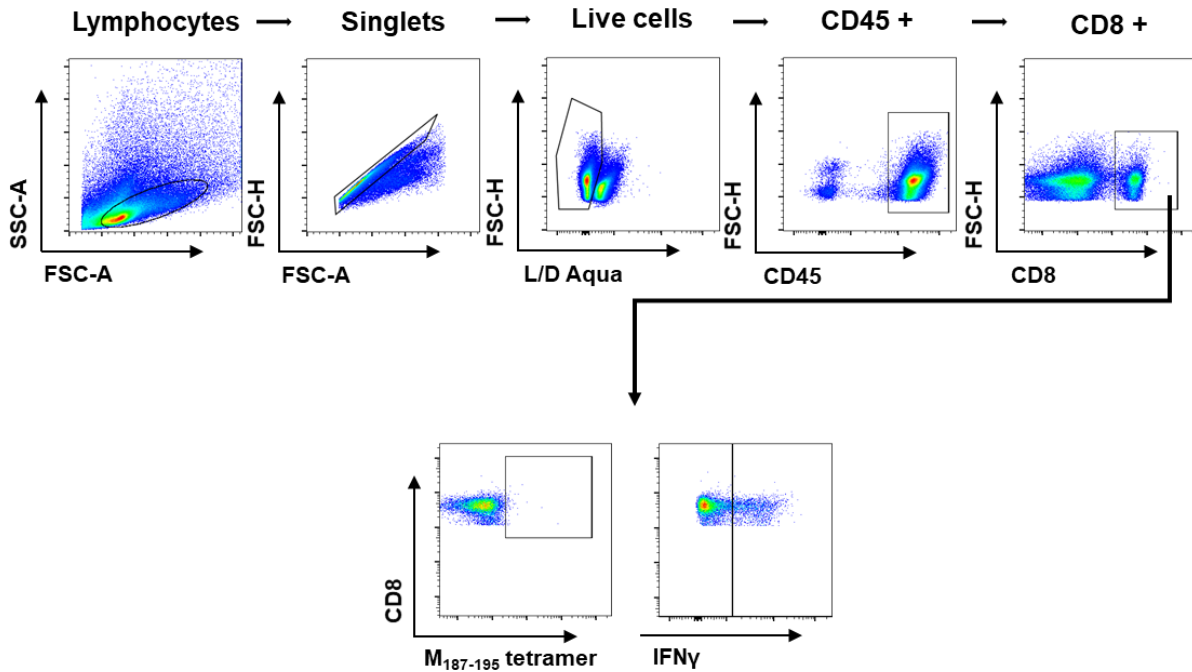

**Supplementary Fig. 1. Gating strategy of H-2D<sup>b</sup> RSV M<sub>187-195</sub> tetramer staining and intracellular cytokine staining.** Lymphocytes were gated using forward and side scatter, and single cells were gated by forward scatter height and area. After gating live cells, CD45-positive and CD8-positive cells were gated. The gate was set on CD8+ cells that are positive for M<sub>187-195</sub> tetramer (lower left) and positive for IFN- $\gamma$  (lower right).
